# Supplementary material
Source: PubMed Central journal article supplement (PMC8012227)

# Supplemental Figures

Multiplexed Imaging Mass Spectrometry  
of the Extracellular Matrix using Serial  
Enzyme Digests from Formalin-Fixed  
Paraffin Embedded Tissue Sections

**Type:** Research Paper

**Co-Authors:** Cassandra L. Clift, Richard R. Drake,  
Anand Mehta, Peggi M. Angel

Analytical and Bioanalytical Chemistry

Special Issue: Mass Spectrometry Imaging

**Supplemental Figure 1. Fragmentation of precursor m/z 1339.9 shows evidence of isobaric CS peak with matrix.** Summed spectra of CID fragmentation across 5400 shots and increasing collision voltages between 20-130eV. Summed spectra shows loss of sulfation state, chain length, and chain formation with fragmented ions corresponding to GalNAc and GlcUA seen.

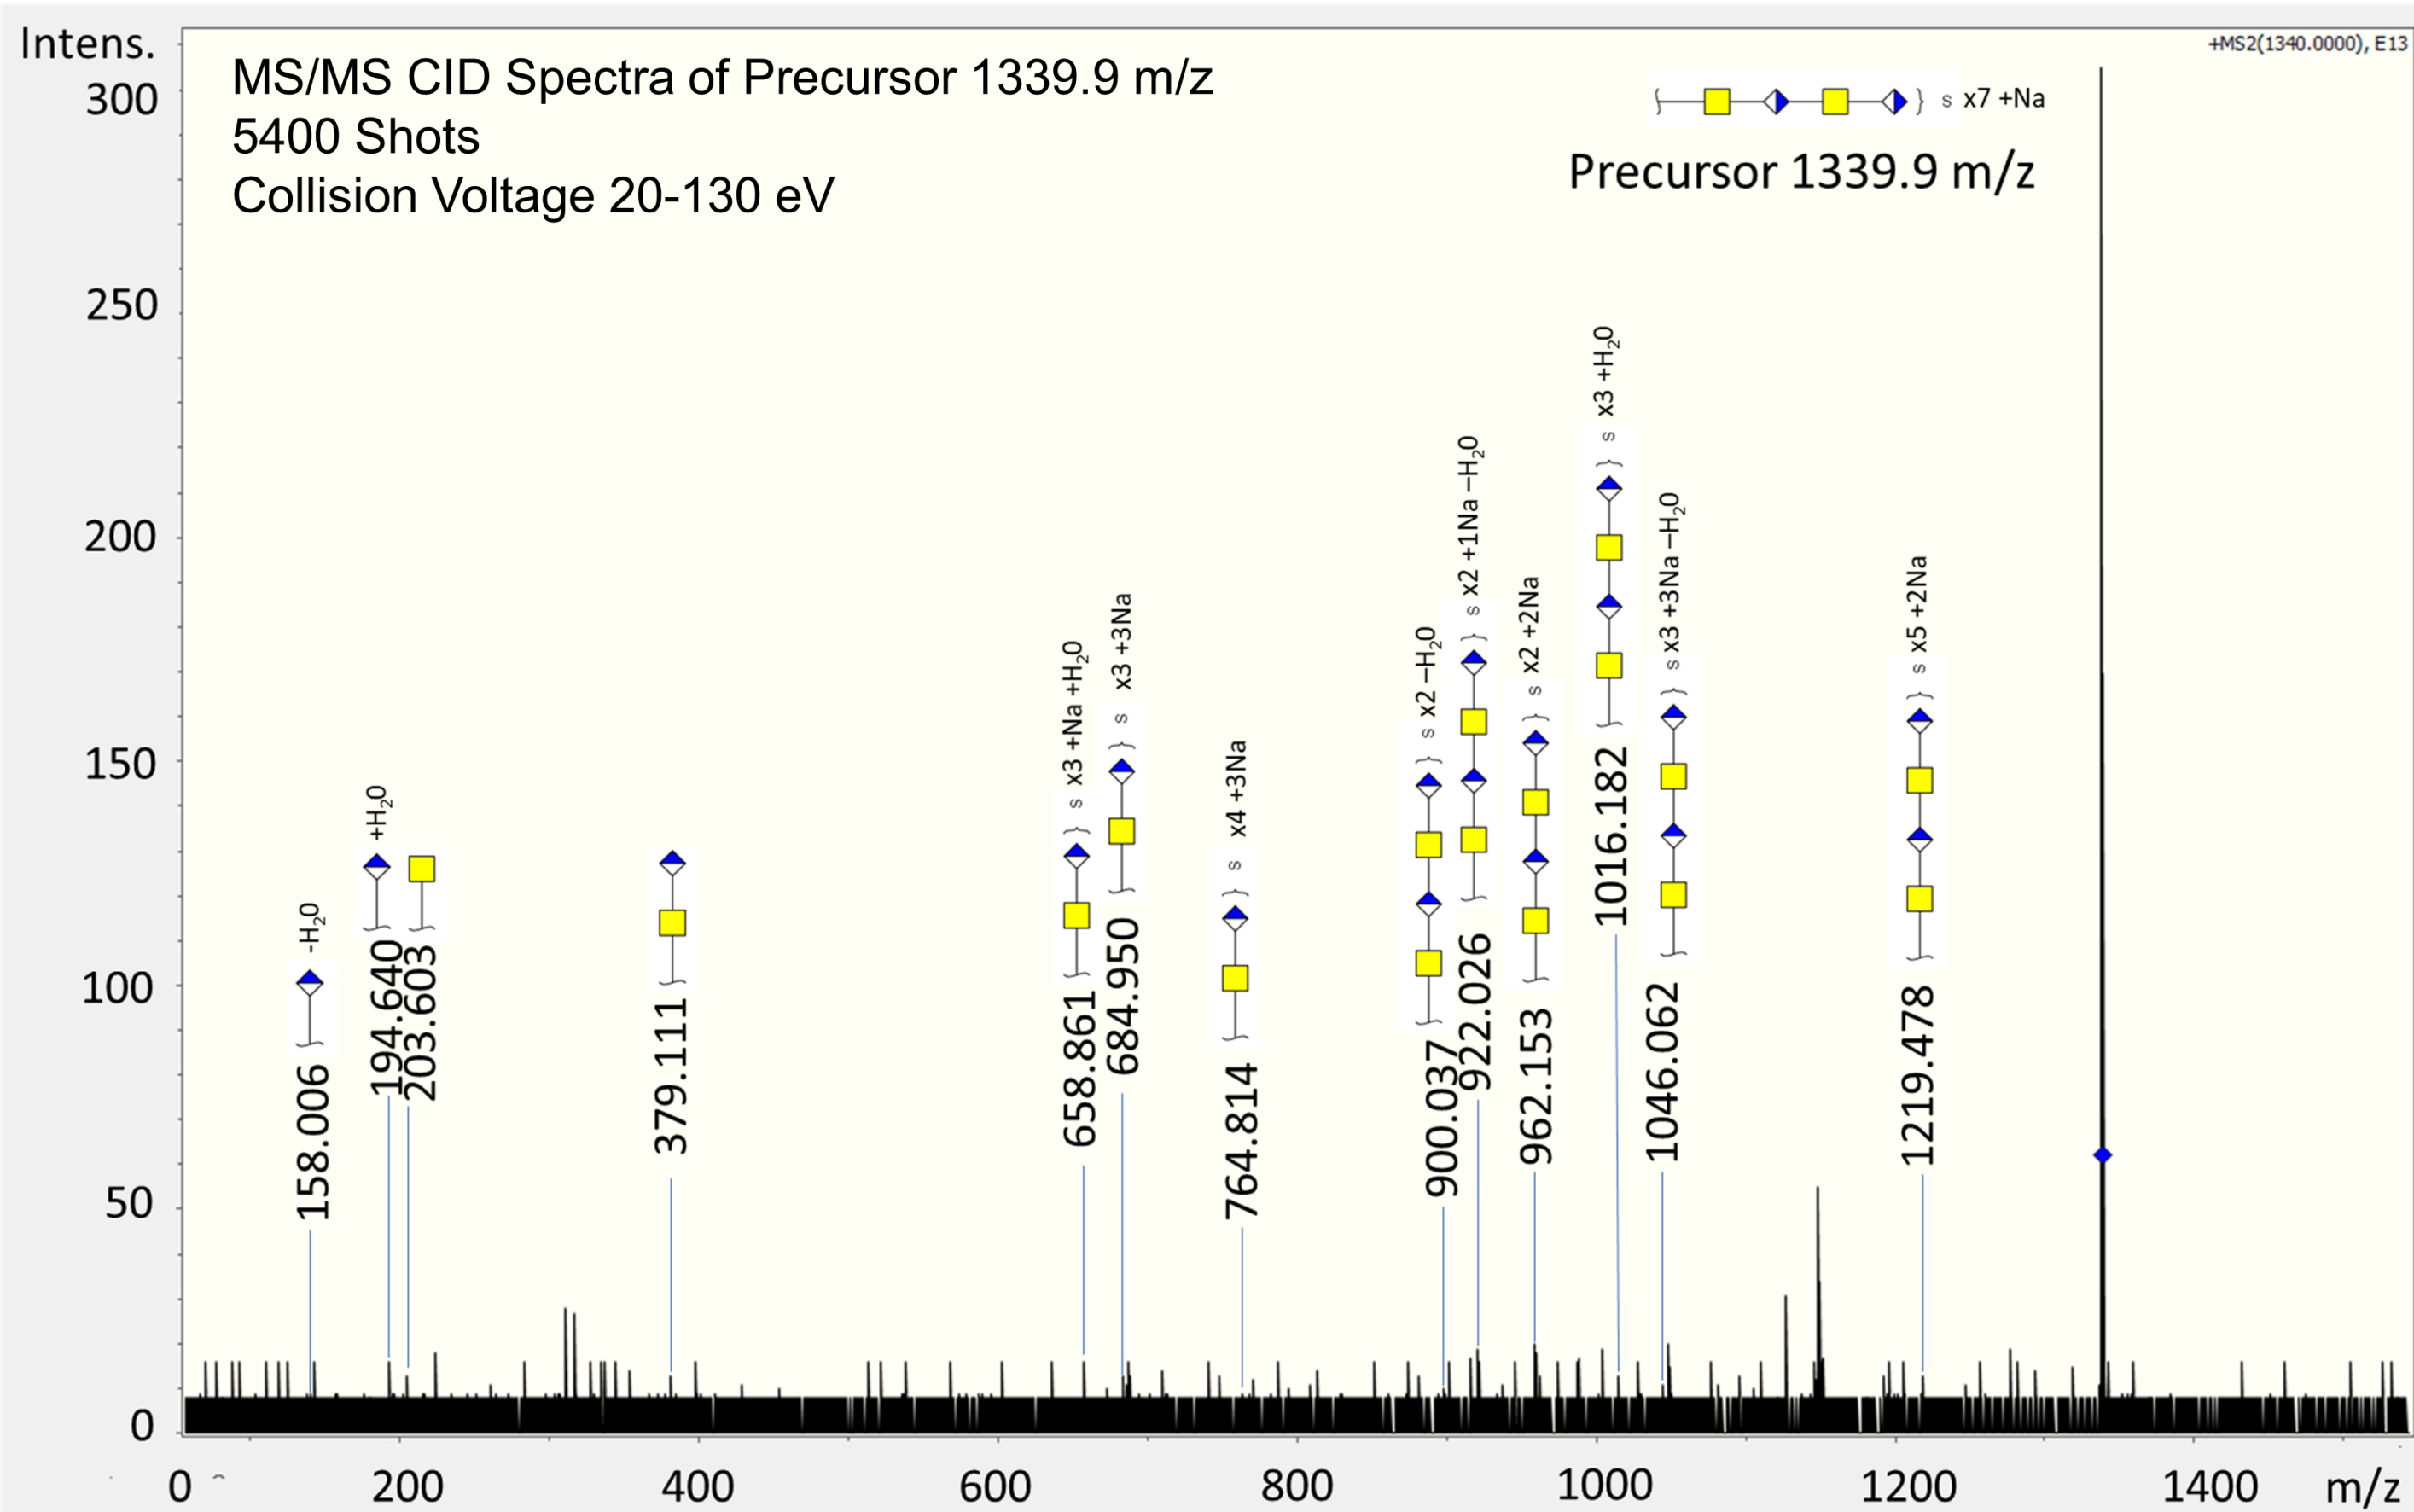

**Supplemental Figure 2. Ion mobility analysis of CS standards and tissue shows unique drift populations of matrix and CS species at isobaric peaks.** **a.** Heat map of spotted CS standards. **b.** Heat map of shots taken on-tissue treated with chondroitinase ABC. **c.** Heat map of shots of matrix only, taken on the same chondroitinase ABC treated slide but off-tissue. **d.** Mobilograms for the CS and Matrix drifts shown in **(e)** for the isobaric peak shown in **(f)**. 10280 shots were summed for all TIMS experiments.

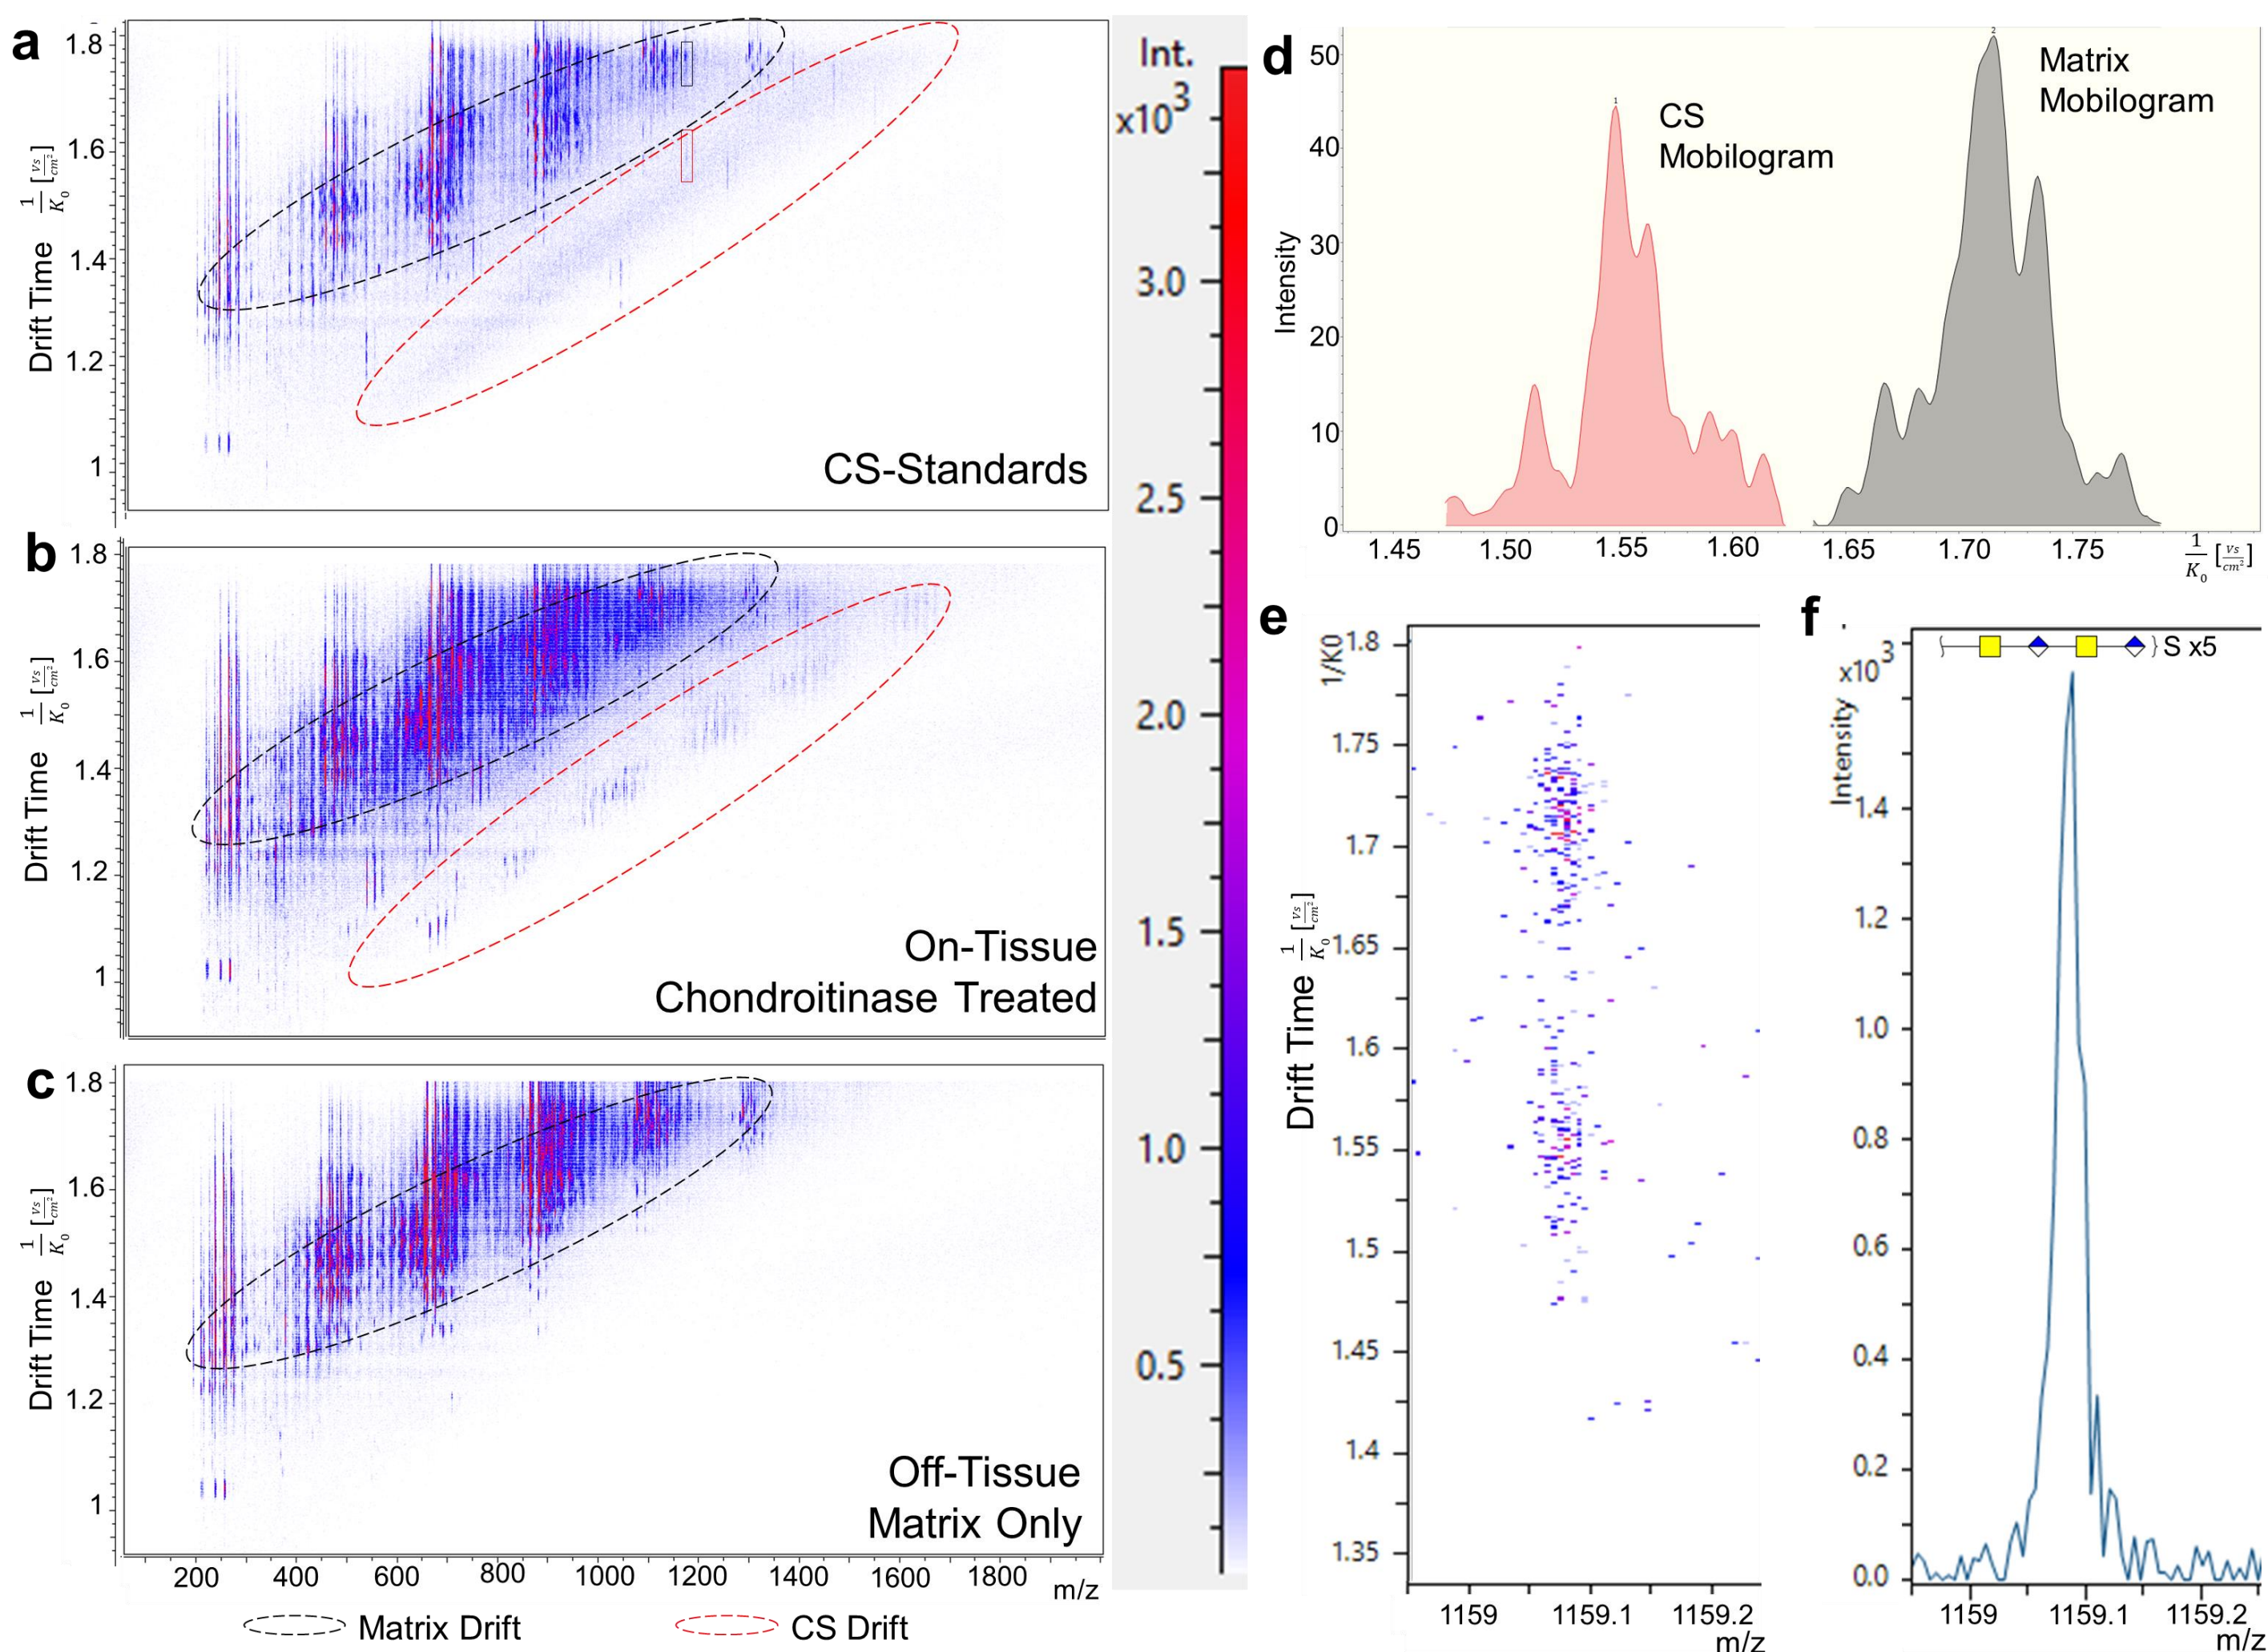

**Supplemental Figure 3. Collagenase peptide imaging is compatible with pre-treatment of trypsin.** **A.** Representative images of COLase3 digests either after antigen retrieval only (C3 alone) or after digestion with a trypsin. Three ECM peaks are shown: collagen 6a3 peptide (top), collagen 3a1 peptide (middle), and vimentin peptide (bottom). **B-D.** Quantification of the percent change in peak signal intensity for all COLase3 peptides identified trypsin incubation and analyte removal as compared to control. Each point represents a COLase3 peptide peak with a boxplot of the data shown to the right. P\* represents hydroxyproline.

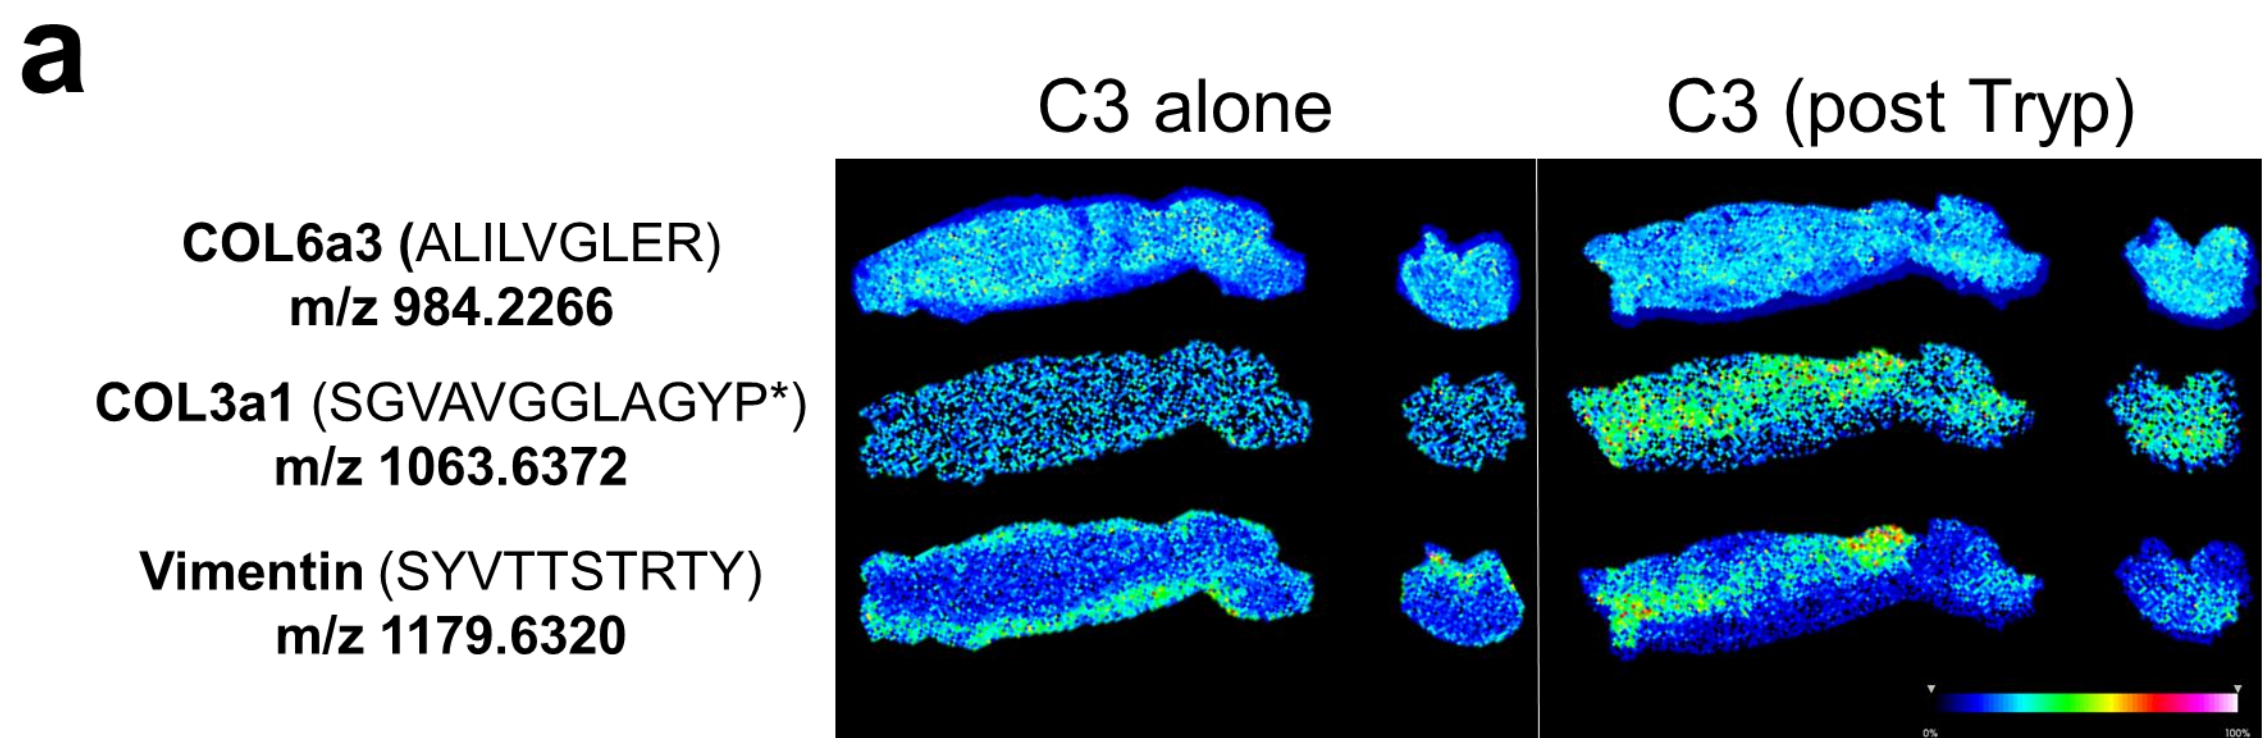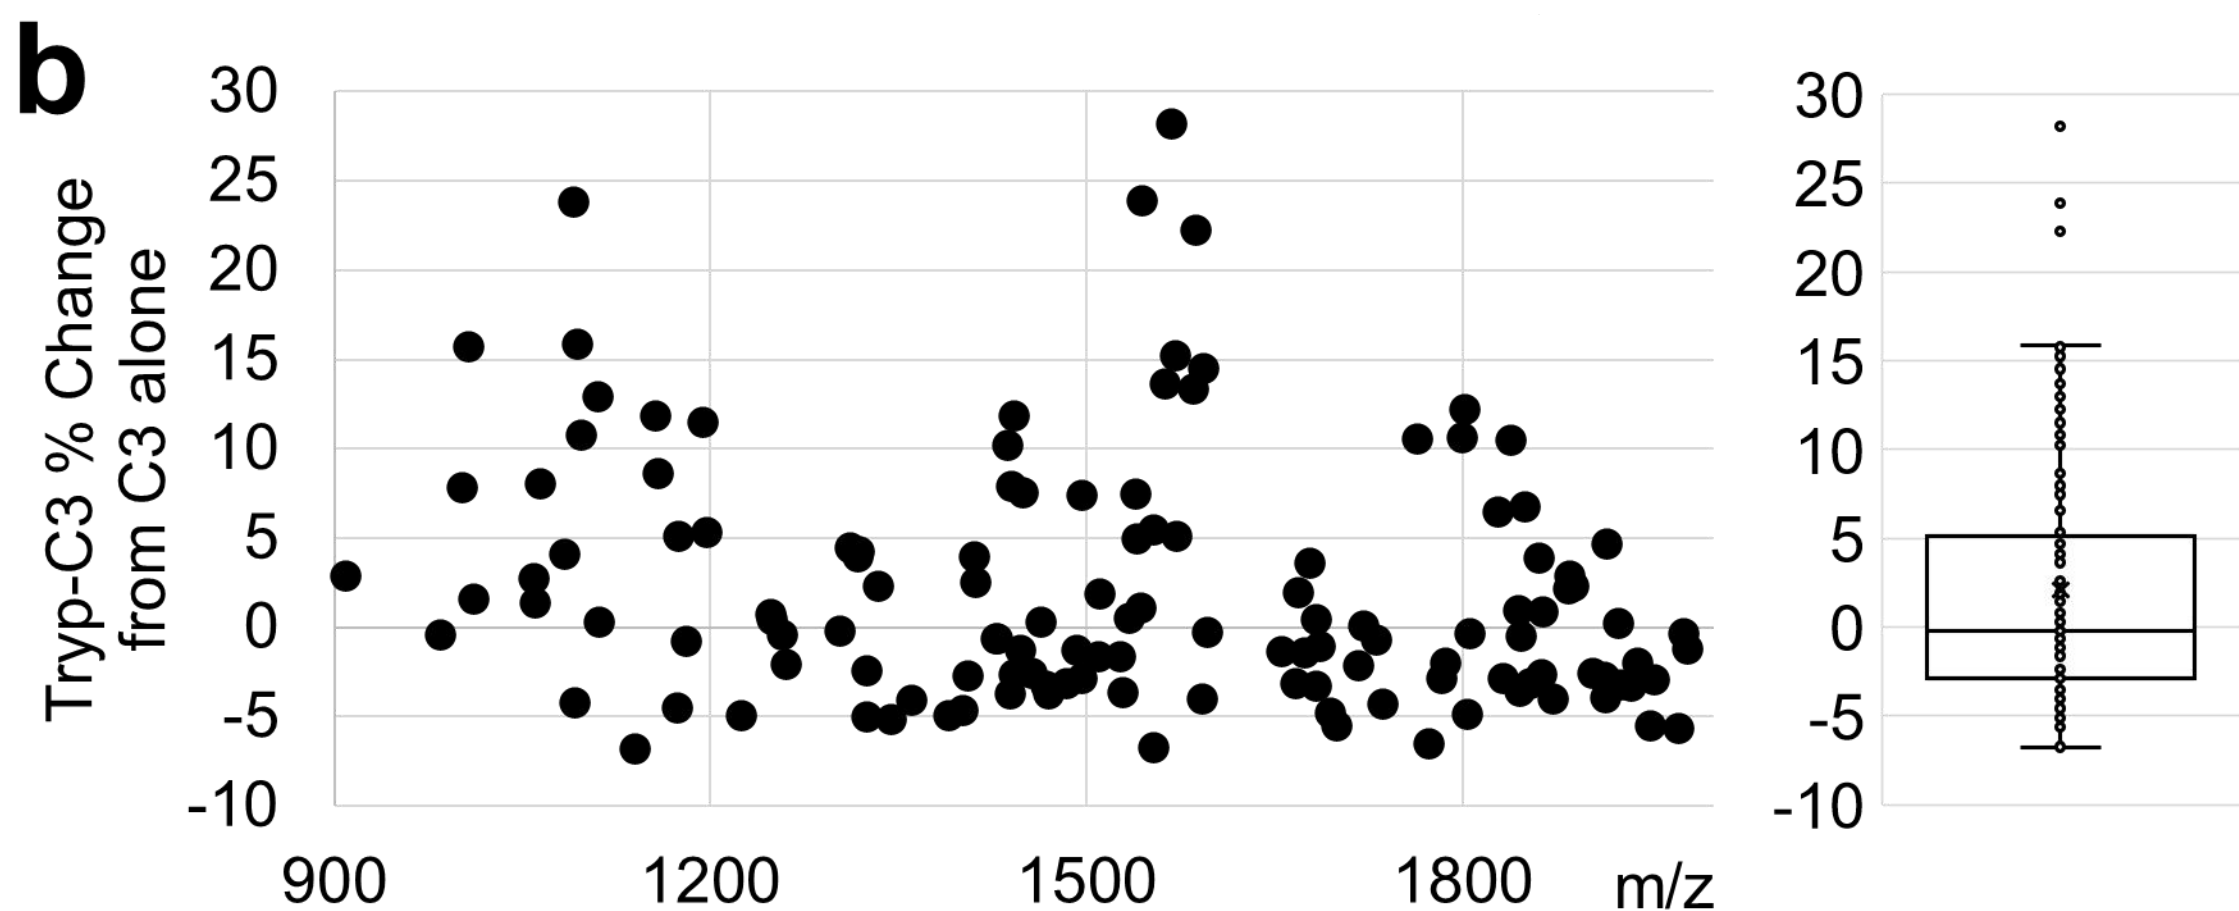

**Supplemental Figure 4. Aortic Valve tissue sections used for reproducibility studies. a-b.** Movat's Pentachrome staining of tissue sections with GAGs in blue, elastin in purple, and collagen in yellow. Tissue shown in **b** has portions of the outflow tract (OT) and aortic wall still attached. OT has minimal collagen staining. Aortic valve in **b** is highlighted by dotted line.

**a**

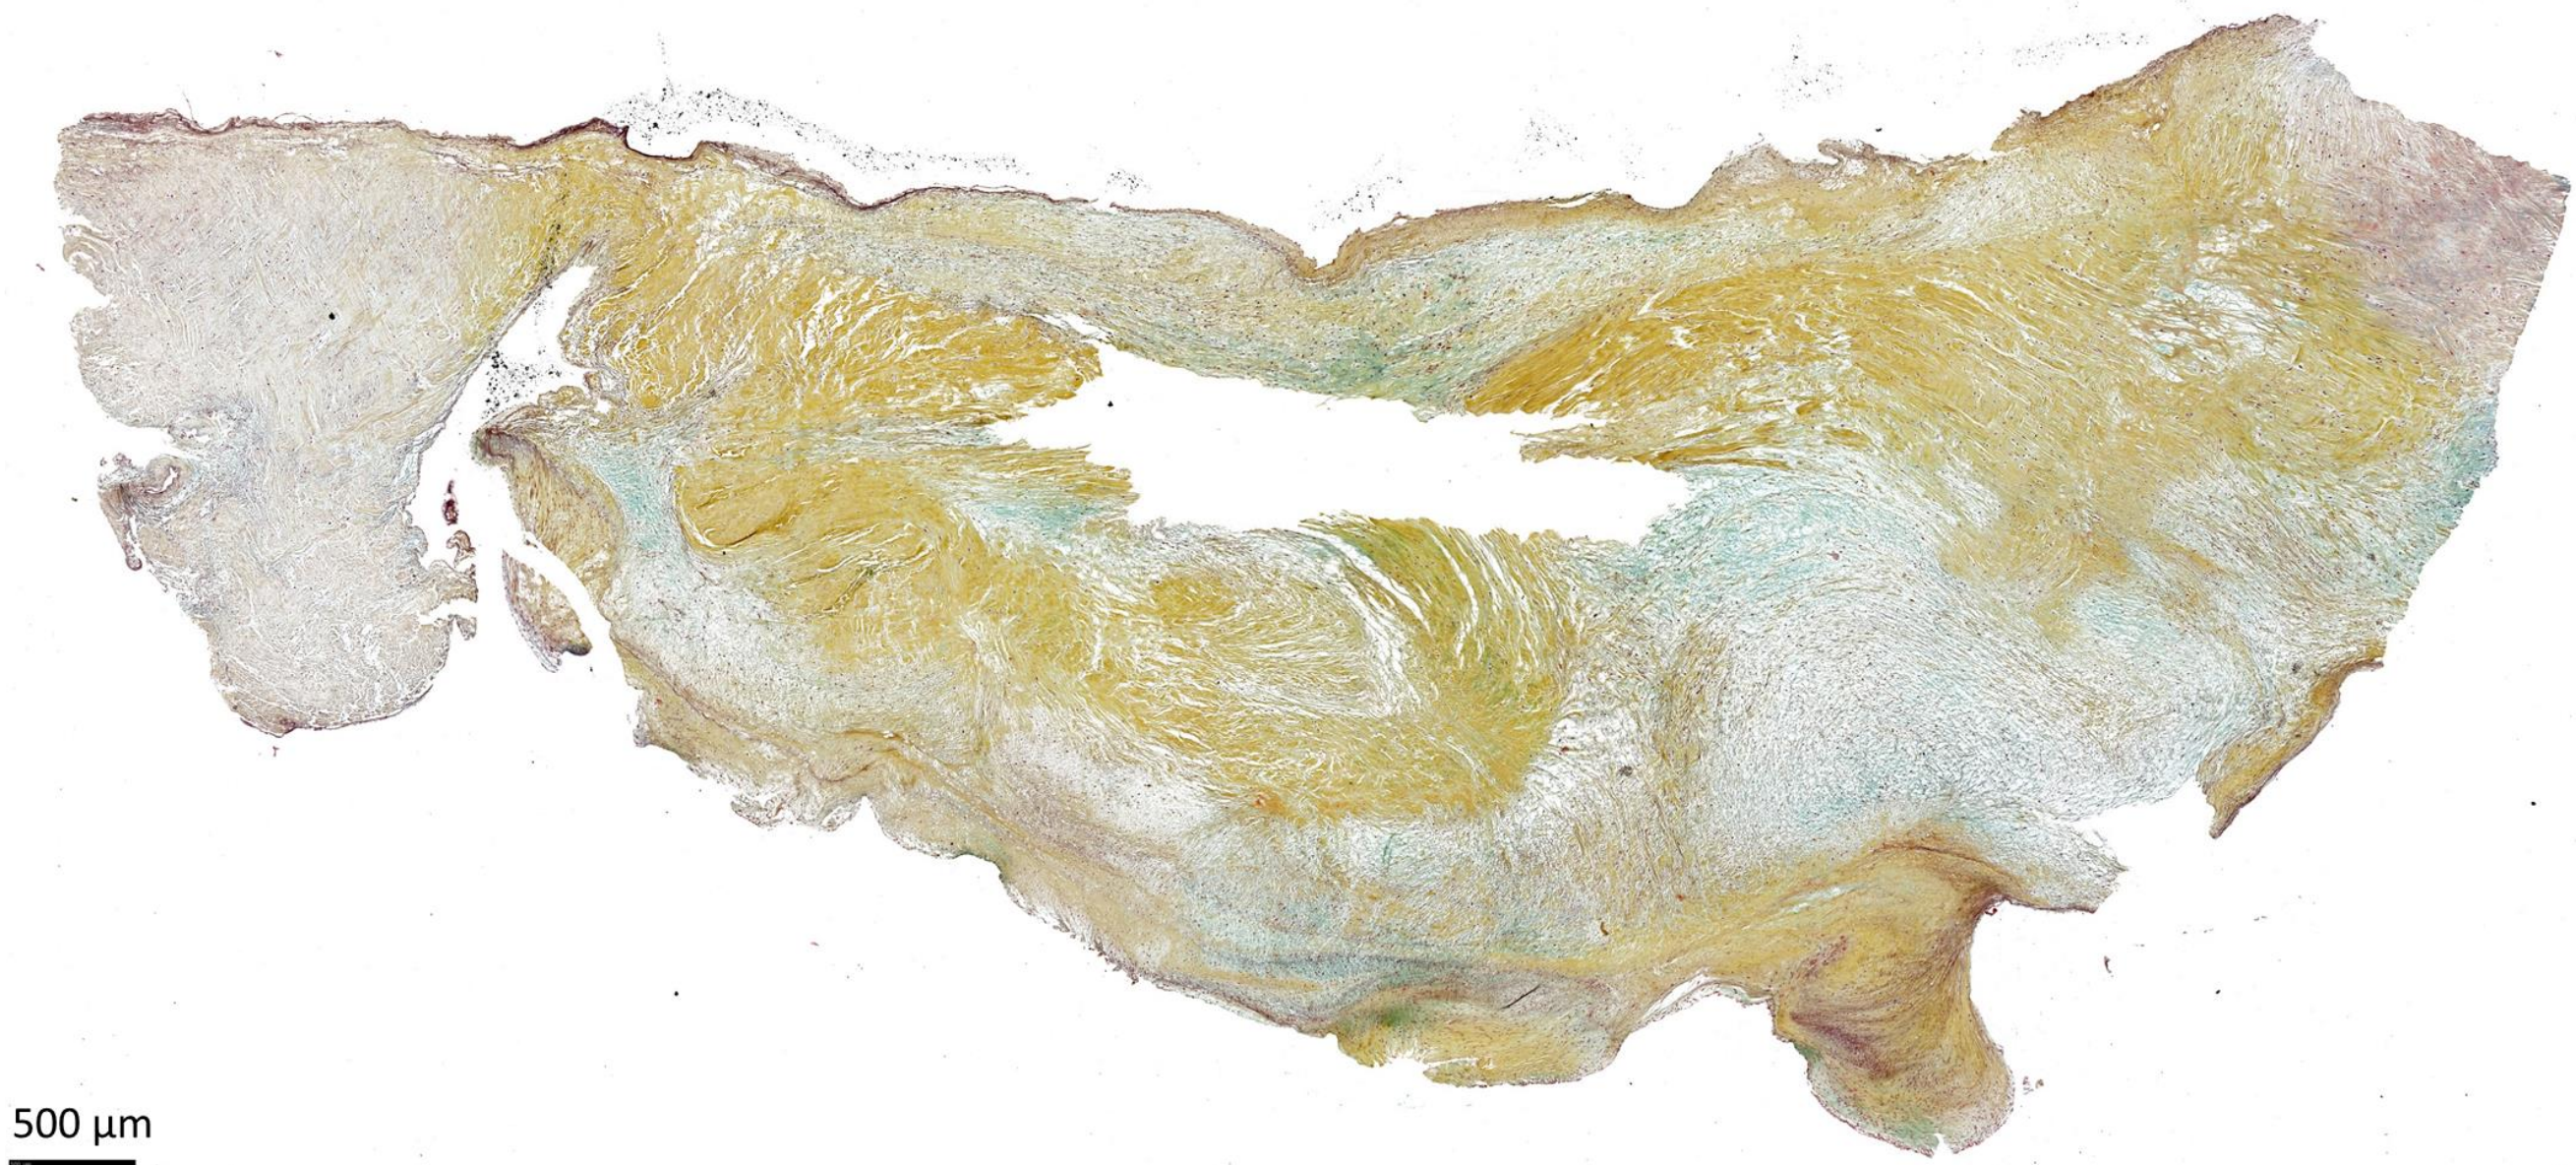

**b**

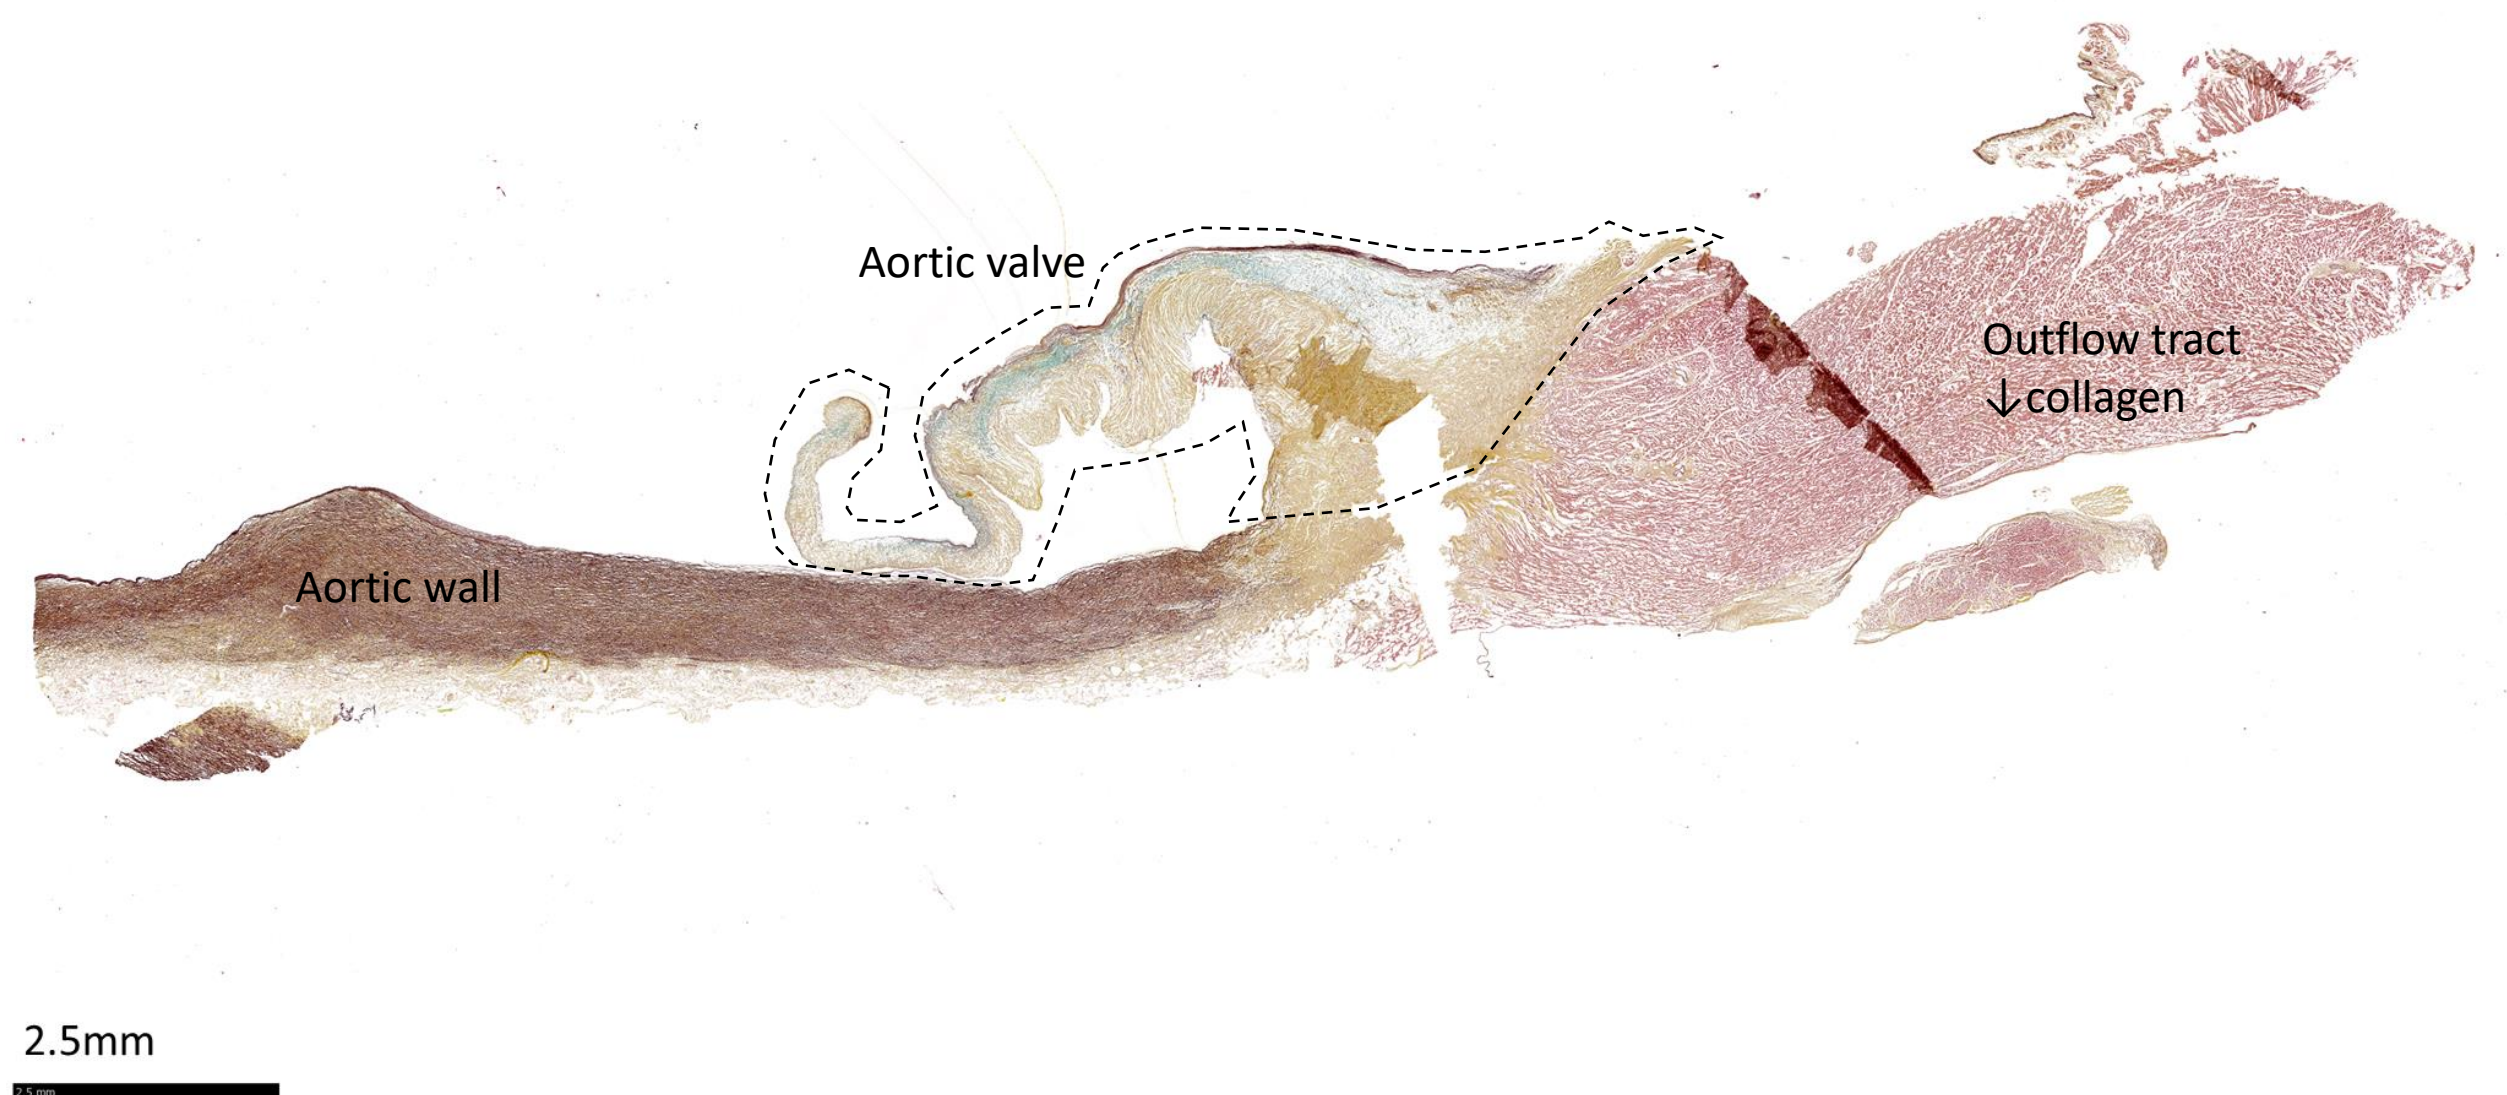

Supplement: NIHMS1666884-supplement-Supplemental_Tables_S1.pdf [file NIHMS1666884-supplement-Supplemental_Tables_S1.pdf]
