# Supplementary material
Source: PubMed Central journal article supplement (PMC8012227)
Supplement: NIHMS1666884-supplement-Supplementary_Figures_R1.pdf [file NIHMS1666884-supplement-Supplementary_Figures_R1.pdf]

**Supplemental Table S1:** Putative Peptide IDs of elastin peptides derived from Elastase (MMP12) imaging mass spectrometry experiments. Intensity values are normalized by TIC (Total Ion Current). Chond: Chondroitinase ABC treated. NG: PNGaseF treated.

| Centroid [m/z] | ± [Da] | Putative Peptide Identification | Modification | Maximum Intensity (TIC) Elastase Alone | Maximum Intensity (TIC) Elastase post-Chond-NG |
|----------------|--------|---------------------------------|--------------|----------------------------------------|------------------------------------------------|
| 822.4190       | 0.0295 | (A)GGLVPGAPGFGPGV(G)            | None         | 2.6E+05                                | 1.4E+06                                        |
| 837.4090       | 0.0291 | (A)GGFPGFVGVGGV(P)              | None         | 9.8E+04                                | 1.8E+05                                        |
| 852.4045       | 0.0265 | (V)FYPGAGLGA(L)                 | None         | 4.2E+05                                | 5.7E+04                                        |
| 868.4242       | 0.0295 | (A)GQFPLGGVA(A)                 | 1Deamidated  | 5.1E+04                                | 1.9E+05                                        |
| 873.4166       | 0.0282 | (A)LGPGGKPPKPGV(G)              | None         | 7.1E+05                                | 2.4E+06                                        |
| 874.4179       | 0.0337 | (V)FYPGAGLGA(L)                 | None         | 4.0E+05                                | 1.0E+06                                        |
| 875.4199       | 0.0329 | (V)PGGAGAIPGI(G)                | None         | 6.1E+04                                | 3.2E+05                                        |
| 886.4386       | 0.0307 | (L)PAGVPGFGV(G)                 | None         | 2.2E+04                                | 5.0E+05                                        |
| 910.4536       | 0.0354 | (A)QFGLGPGIGV(A)                | 1Deamidated  | 3.0E+04                                | 1.4E+05                                        |
| 925.4983       | 0.0164 | (V)PGAPGFGPGV(G)                | None         | 6.1E+03                                | 6.6E+04                                        |
| 928.4002       | 0.0152 | (V)GAGGFPFGV(G)                 | None         | 1.0E+04                                | 1.1E+05                                        |
| 939.4689       | 0.0160 | (A)GQFPLGGVAA(R)                | 1Deamidated  | 1.4E+04                                | 9.1E+04                                        |
| 943.4293       | 0.0169 | (V)GVGGVGVPGGA(G)               | None         | 1.5E+04                                | 5.9E+04                                        |
| 944.4568       | 0.0101 | (A)AKAQFQAA(A)                  | 2Deamidated  | 1.1E+04                                | 5.5E+04                                        |
| 955.4231       | 0.0321 | (A)KFGAGAAGV(L)                 | None         | 8.5E+04                                | 8.7E+04                                        |
| 969.4907       | 0.0206 | (A)PKLPGGYGL(P)                 | None         | 7.5E+03                                | 1.1E+05                                        |
| 994.4364       | 0.0392 | (A)QFGLVPGVGV(A)                | None         | 4.4E+04                                | 1.9E+05                                        |
| 1029.5049      | 0.0412 | (A)GKAGYPTGT(G)                 | 1Xlink:DSS1  | 1.3E+04                                | 1.1E+05                                        |
| 1063.5128      | 0.0495 | (I)IHPSQPGGVPGA(V)              | None         | 4.9E+04                                | 4.8E+05                                        |
| 1079.5696      | 0.0299 | (V)LPGTGARFPGV(G)               | None         | 1.9E+04                                | 2.9E+05                                        |
| 1136.5752      | 0.0436 | (L)PGGYGLPYST(G)                | None         | 5.5E+04                                | 1.5E+05                                        |
| 1154.5792      | 0.0254 | (L)PGVYPGGVLPGA(R)              | None         | 1.0E+04                                | 1.1E+05                                        |
| 1158.5788      | 0.0330 | (A)GVPFGAGADEGV(R)              | None         | 8.9E+03                                | 1.7E+05                                        |
| 1180.5562      | 0.0247 | (V)PGVGVPGVGV(P)                | None         | 1.2E+04                                | 3.7E+05                                        |
| 1188.5690      | 0.0216 | (L)PYGYGPGGVAGAA(G)             | None         | 6.7E+03                                | 8.2E+04                                        |
| 1203.5700      | 0.0268 | (V)PGAPGFGPGVGV(P)              | None         | 6.9E+03                                | 1.2E+05                                        |
| 1241.6165      | 0.0081 | (L)GKSCGRKRK(-)                 | None         | 3.6E+03                                | 1.1E+05                                        |
| 1241.6308      | 0.0062 | (T)YGVGAGGFPFGV(G)              | None         | 3.6E+03                                | 1.0E+05                                        |
| 1326.6959      | 0.0196 | (I)KAPKLPGGYGL(P)               | None         | 2.3E+03                                | 1.0E+05                                        |
| 1366.8156      | 0.0361 | (I)PGGVPGGVFYPGAGL(G)           | None         | 2.6E+03                                | 4.7E+05                                        |
| 1369.6442      | 0.0350 | (L)PYGFGPGGVAGAA(G)             | None         | 1.2E+04                                | 1.3E+05                                        |
| 1388.7253      | 0.0299 | (A)LGALGYQGGGA(C)               | None         | 1.2E+03                                | 5.3E+05                                        |
| 1390.6470      | 0.0227 | (S)IIHPSQPGGV(P)                | None         | 9.9E+03                                | 1.9E+05                                        |
| 1395.6660      | 0.0639 | (A)GGFPGFVGVGIVPGV(A)           | None         | 3.1E+03                                | 1.0E+05                                        |
| 1397.6684      | 0.0247 | (A)FPAGAFPGA(L)                 | None         | 4.0E+03                                | 6.1E+04                                        |
| 1434.6566      | 0.0258 | (V)PGFVGAGVPGFGA(G)             | None         | 1.4E+03                                | 1.6E+05                                        |
| 1498.9105      | 0.0381 | (T)GVKAKAPGGGA(F)               | None         | 3.3E+03                                | 1.3E+06                                        |
| 1525.8351      | 0.0340 | (V)PGFVGAGVPGFGV(G)             | None         | 2.6E+03                                | 2.9E+05                                        |
| 1605.7924      | 0.0752 | (A)KYGAAGLGGV(L)                | None         | 5.4E+03                                | 4.1E+04                                        |
| 1773.8071      | 0.0834 | (V)GPFGGPQGVPLGYPIKA(P)         | None         | 7.2E+03                                | 4.1E+04                                        |
| 1962.0014      | 0.1164 | (I)PGVGPFGGQQPGVPL(G)           | 1Deamidated  | 2.6E+03                                | 7.9E+04                                        |
| 1962.9823      | 0.0047 | (I)PGVGPFGGQQPGVPL(G)           | 2Deamidated  | 2.6E+03                                | 7.1E+04                                        |
